# Supplementary material for: The Impact of Protein Structure and Sequence Similarity on the Accuracy of Machine-Learning Scoring Functions for Binding Affinity Prediction
Source: Biomolecules. 2018 Mar 14;8(1):12. doi: 10.3390/biom8010012 (PMC5871981; doi:10.3390/biom8010012)
Supplement: Supplementary file 1 [file biomolecules-08-00012-s001.xlsx]

## Sheet: sequence similarity
The reference paper is "Structural and Sequence Similarity Makes a Significant Impact on Machine-Learning-Based Scoring Functions for Protein–Ligand Interactions" by Yang Li and Jianyi Yang, published in J. Chem. Inf. Model., 2017, 57 (4), pp 1007–1012
	RF-Score in the ref paper				RF-Score				X-Score in the ref paper				X-Score				RF::X-Score				RF-Score-v3
Cutoff	No in train set	Rp	Rs	RMSE	No in train set	Rp	Rs	RMSE	No in train set	Rp	Rs	RMSE	No in train set	Rp	Rs	RMSE	No in train set	Rp	Rs	RMSE	No in train set	Rp	Rs	RMSE
1	1105	0.783	0.769	1.542	1105	0.768	0.755	1.574	1105	0.642941	0.706693	1.867	1105	0.642941	0.706693	1.87218	1105	0.710126	0.698316	1.69343	1105	0.802162	0.796304	1.50199
0.999	786	0.681	0.698	1.783	786	0.677	0.69	1.794	786	0.642524	0.708023	1.878	786	0.642524	0.708023	1.88777	786	0.616541	0.630537	1.87973	786	0.711515	0.731368	1.73218
0.998	785	0.687	0.703	1.774	785	0.678	0.689	1.791	785	0.642551	0.707994	1.878	785	0.642551	0.707994	1.88778	785	0.616085	0.629284	1.88059	785	0.712672	0.733426	1.73062
0.997	781	0.682	0.693	1.782	781	0.682	0.695	1.786	781	0.642448	0.707974	1.878	781	0.642448	0.707974	1.88692	781	0.618487	0.631804	1.87682	781	0.712355	0.73184	1.73226
0.996	746	0.682	0.694	1.784	746	0.668	0.679	1.809	746	0.645904	0.70764	1.861	746	0.645904	0.70764	1.88009	746	0.632781	0.65674	1.85596	746	0.704197	0.723257	1.74743
0.995	726	0.665	0.673	1.814	726	0.656	0.665	1.832	726	0.645476	0.707751	1.863	726	0.645476	0.707751	1.88189	726	0.619384	0.643752	1.8805	726	0.696058	0.712384	1.76345
0.99	692	0.647	0.657	1.836	692	0.637	0.644	1.854	692	0.645029	0.706628	1.862	692	0.645029	0.706628	1.8797	692	0.618018	0.640925	1.88055	692	0.684437	0.698885	1.7757
0.985	678	0.639	0.649	1.849	678	0.63	0.637	1.867	678	0.645696	0.708825	1.863	678	0.645696	0.708825	1.88228	678	0.613343	0.636425	1.88897	678	0.673415	0.687495	1.79785
0.98	670	0.634	0.643	1.855	670	0.627	0.634	1.873	670	0.645943	0.709109	1.862	670	0.645943	0.709109	1.88175	670	0.607206	0.62649	1.90082	670	0.671324	0.686958	1.80059
0.975	640	0.628	0.633	1.864	640	0.621	0.63	1.878	640	0.646754	0.708954	1.857	640	0.646754	0.708954	1.87681	640	0.601969	0.628693	1.91038	640	0.663129	0.681599	1.80902
0.97	638	0.619	0.624	1.878	638	0.618	0.627	1.884	638	0.6466	0.708927	1.858	638	0.6466	0.708927	1.8778	638	0.598922	0.626276	1.91752	638	0.658965	0.677468	1.8165
0.965	606	0.627	0.635	1.869	606	0.619	0.625	1.883	606	0.646036	0.709565	1.863	606	0.646036	0.709565	1.88607	606	0.601588	0.628275	1.91628	606	0.662776	0.683622	1.81173
0.96	606	0.627	0.635	1.869	606	0.621	0.63	1.88	606	0.646036	0.709565	1.863	606	0.646036	0.709565	1.88607	606	0.603772	0.629689	1.9134	606	0.663417	0.685159	1.80989
0.955	584	0.623	0.626	1.881	584	0.615	0.622	1.896	584	0.644792	0.708441	1.875	584	0.644792	0.708441	1.90187	584	0.596129	0.620616	1.92939	584	0.661306	0.686529	1.82387
0.95	584	0.623	0.626	1.881	584	0.617	0.624	1.893	584	0.644792	0.708441	1.875	584	0.644792	0.708441	1.90187	584	0.596476	0.620131	1.92903	584	0.660751	0.686066	1.825
0.9	565	0.622	0.621	1.886	565	0.616	0.622	1.895	565	0.644098	0.70734	1.863	565	0.644098	0.70734	1.88585	565	0.59425	0.618088	1.93565	565	0.65883	0.681174	1.83147
0.85	558	0.631	0.638	1.867	558	0.62	0.624	1.887	558	0.645339	0.708624	1.855	558	0.645339	0.708624	1.87508	558	0.605792	0.626834	1.91402	558	0.665617	0.68529	1.81643
0.8	554	0.629	0.637	1.871	554	0.615	0.616	1.895	554	0.644884	0.708876	1.857	554	0.644884	0.708876	1.87878	554	0.606901	0.625859	1.91422	554	0.664547	0.681065	1.82065
0.75	553	0.637	0.64	1.859	553	0.618	0.62	1.891	553	0.644875	0.7089	1.858	553	0.644875	0.7089	1.87882	553	0.607215	0.625549	1.91277	553	0.66391	0.680965	1.82092
0.7	552	0.632	0.64	1.864	552	0.619	0.623	1.888	552	0.645134	0.707758	1.852	552	0.645134	0.707758	1.87175	552	0.608353	0.626384	1.91106	552	0.663989	0.679607	1.81882
0.65	545	0.613	0.623	1.896	545	0.608	0.615	1.905	545	0.644805	0.708618	1.853	545	0.644805	0.708618	1.87332	545	0.600439	0.621845	1.92509	545	0.658081	0.675703	1.82848
0.6	542	0.613	0.622	1.896	542	0.596	0.6	1.927	542	0.643691	0.708488	1.856	542	0.643691	0.708488	1.87878	542	0.589703	0.611675	1.94522	542	0.649813	0.665655	1.84596
0.55	535	0.611	0.618	1.903	535	0.598	0.603	1.926	535	0.644282	0.708797	1.858	535	0.644282	0.708797	1.88167	535	0.590846	0.612853	1.94306	535	0.650341	0.667977	1.84873
0.5	522	0.6	0.607	1.913	522	0.592	0.601	1.933	522	0.644033	0.707679	1.856	522	0.644033	0.707679	1.87925	522	0.585677	0.608637	1.9526	522	0.650856	0.669041	1.84612
0.45	508	0.6	0.602	1.918	508	0.594	0.598	1.937	508	0.643804	0.706764	1.857	508	0.643804	0.706764	1.88083	508	0.583325	0.604756	1.95795	508	0.658245	0.674649	1.84294
0.4	451	0.62	0.627	1.896	451	0.6	0.604	1.935	451	0.64691	0.70863	1.857	451	0.64691	0.70863	1.885	451	0.596687	0.614187	1.94952	451	0.652209	0.668336	1.85997
0.35	350	0.619	0.64	1.925	350	0.621	0.639	1.94	350	0.642939	0.705381	1.87	350	0.642939	0.705381	1.9025	350	0.567976	0.572674	1.99218	350	0.65821	0.679945	1.88328
0.3	181	0.559	0.569	2.007	181	0.532	0.519	2.04	181	0.645191	0.697321	1.838	181	0.645191	0.697321	1.8538	181	0.552498	0.554091	2.02202	181	0.593319	0.616334	1.97204
0.25	Such cutoff values are not presented in the reference paper				56	0.397	0.41	2.188	Such cutoff values are not presented in the reference paper				56	0.519647	0.551306	2.04808	56	0.528883	0.533959	2.0185	56	0.496021	0.492523	2.06657
0.2					14	0.231	0.231	2.397					14	0.397	0.419	2.632	14	0.201	0.194	2.398	14	0.325	0.34	2.305

## Sheet: structural similarity
The reference paper is "Structural and Sequence Similarity Makes a Significant Impact on Machine-Learning-Based Scoring Functions for Protein–Ligand Interactions" by Yang Li and Jianyi Yang, published in J. Chem. Inf. Model., 2017, 57 (4), pp 1007–1012
	RF-Score in the ref paper				RF-Score				X-Score in the ref paper				X-Score				RF::X-Score				RF-Score-v3
Cutoff	No in train set	Rp	Rs	RMSE	No in train set	Rp	Rs	RMSE	No in train set	Rp	Rs	RMSE	No in train set	Rp	Rs	RMSE	No in train set	Rp	Rs	RMSE	No in train set	Rp	Rs	RMSE
1	1105	0.783	0.769	1.542	1105	0.768	0.754	1.575	1105	0.642941	0.706693	1.867	1105	0.642941	0.706693	1.87218	1105	0.709769	0.698572	1.69341	1105	0.800445	0.79422	1.5061
0.999	964	0.731	0.729	1.669	964	0.719	0.718	1.694	964	0.644429	0.704984	1.862	964	0.644429	0.704984	1.86856	964	0.644472	0.651419	1.82734	964	0.75738	0.764869	1.61981
0.998	867	0.705	0.711	1.719	867	0.699	0.706	1.731	867	0.644986	0.706326	1.859	867	0.644986	0.706326	1.86808	867	0.646606	0.658552	1.82215	867	0.734119	0.745281	1.66709
0.997	810	0.689	0.698	1.763	810	0.686	0.697	1.772	810	0.6456	0.705581	1.863	810	0.6456	0.705581	1.87341	810	0.636313	0.649512	1.84654	810	0.720308	0.738568	1.71024
0.996	793	0.684	0.694	1.774	793	0.679	0.688	1.785	793	0.64544	0.706012	1.864	793	0.64544	0.706012	1.87489	793	0.629251	0.639309	1.858	793	0.718045	0.736115	1.71698
0.995	779	0.682	0.693	1.776	779	0.677	0.689	1.787	779	0.645641	0.706245	1.864	779	0.645641	0.706245	1.87482	779	0.63	0.640917	1.85739	779	0.714895	0.731049	1.72228
0.99	710	0.66	0.66	1.818	710	0.649	0.649	1.834	710	0.646015	0.70694	1.858	710	0.646015	0.70694	1.87282	710	0.629311	0.6482	1.85971	710	0.696517	0.708014	1.75401
0.985	685	0.66	0.664	1.819	685	0.645	0.646	1.844	685	0.645951	0.708148	1.857	685	0.645951	0.708148	1.87445	685	0.626757	0.646348	1.86898	685	0.682272	0.693062	1.78141
0.98	645	0.647	0.648	1.836	645	0.639	0.641	1.853	645	0.64718	0.70961	1.85	645	0.64718	0.70961	1.86709	645	0.624971	0.643903	1.86836	645	0.674671	0.686642	1.78817
0.975	605	0.641	0.646	1.853	605	0.62	0.629	1.891	605	0.64572	0.709384	1.854	605	0.64572	0.709384	1.87471	605	0.612653	0.632834	1.89398	605	0.661717	0.683591	1.81801
0.97	582	0.635	0.64	1.863	582	0.619	0.627	1.891	582	0.645567	0.709151	1.855	582	0.645567	0.709151	1.87457	582	0.614305	0.632876	1.88983	582	0.663097	0.682065	1.81898
0.965	567	0.628	0.635	1.872	567	0.619	0.627	1.893	567	0.644842	0.707704	1.859	567	0.644842	0.707704	1.88004	567	0.613559	0.629735	1.89614	567	0.665453	0.683572	1.82024
0.96	563	0.629	0.633	1.873	563	0.613	0.617	1.905	563	0.644554	0.707515	1.86	563	0.644554	0.707515	1.88194	563	0.605845	0.623739	1.91008	563	0.664287	0.683103	1.82431
0.955	548	0.619	0.619	1.887	548	0.612	0.619	1.904	548	0.644371	0.707184	1.86	548	0.644371	0.707184	1.88221	548	0.599899	0.617874	1.92203	548	0.660539	0.678548	1.82698
0.95	540	0.615	0.613	1.893	540	0.604	0.605	1.915	540	0.644788	0.709105	1.856	540	0.644788	0.709105	1.8769	540	0.596065	0.616307	1.93009	540	0.658575	0.672316	1.83336
0.9	510	0.618	0.615	1.895	510	0.606	0.607	1.919	510	0.64338	0.707861	1.861	510	0.64338	0.707861	1.88653	510	0.585482	0.607719	1.95438	510	0.652698	0.664499	1.85521
0.85	476	0.618	0.618	1.9	476	0.613	0.619	1.926	476	0.644016	0.707182	1.848	476	0.644016	0.707182	1.87595	476	0.569459	0.588141	1.99096	476	0.653318	0.668256	1.87462
0.8	462	0.615	0.618	1.906	462	0.613	0.622	1.925	462	0.644024	0.707799	1.845	462	0.644024	0.707799	1.87121	462	0.570287	0.587215	1.98638	462	0.650125	0.668268	1.87668
0.75	443	0.618	0.629	1.903	443	0.625	0.639	1.918	443	0.644396	0.707892	1.843	443	0.644396	0.707892	1.87631	443	0.579122	0.592171	1.98332	443	0.659067	0.678452	1.87143
0.7	416	0.63	0.637	1.88	416	0.628	0.64	1.914	416	0.643677	0.709426	1.841	416	0.643677	0.709426	1.87704	416	0.592406	0.610246	1.96909	416	0.654439	0.674144	1.87621
0.65	400	0.615	0.628	1.899	400	0.62	0.635	1.924	400	0.643687	0.708631	1.841	400	0.643687	0.708631	1.88249	400	0.587065	0.60305	1.97599	400	0.646781	0.666306	1.88693
0.6	371	0.6	0.617	1.923	371	0.615	0.631	1.936	371	0.641245	0.706997	1.843	371	0.641245	0.706997	1.88237	371	0.595121	0.610627	1.96665	371	0.644815	0.668274	1.89387
0.55	330	0.602	0.616	1.928	330	0.618	0.63	1.94	330	0.643928	0.708744	1.848	330	0.643928	0.708744	1.89541	330	0.588164	0.603305	1.98143	330	0.639377	0.663519	1.90627
0.5	294	0.582	0.597	1.96	294	0.611	0.621	1.956	294	0.646034	0.709505	1.842	294	0.646034	0.709505	1.89258	294	0.561712	0.578269	2.05047	294	0.637262	0.655331	1.92478
0.45	222	0.571	0.599	1.975	222	0.565	0.594	2.053	222	0.640378	0.703984	1.87	222	0.640378	0.703984	1.97683	222	0.519204	0.521833	2.16713	222	0.601695	0.622525	2.0215
0.4	116	0.556	0.584	1.991	116	0.561	0.595	2.031	116	0.624101	0.665691	1.87	116	0.624101	0.665691	1.9052	116	0.55645	0.551994	2.03368	116	0.601479	0.624181	1.98353
0.35	Such cutoff values are not presented in the reference paper				43	0.449	0.448	2.16	Such cutoff values are not presented in the reference paper				43	0.538779	0.567177	2.00178	43	0.546539	0.564421	2.07851	43	0.492516	0.480776	2.12159
0.3					9	0.243	0.244	2.39217					9	0.463	0.438	2.369	9	0.337	0.269	2.259	9	0.279	0.28	2.328
0.25					1	0	NaN	2.56631					1	NaN	NaN	Inf	1	0	NaN	2.566	1	0	NaN	2.566
